# Supplementary material for: The N-terminal domain of the type 1 Ins(1,4,5)P3 receptor stably expressed in MDCK cells interacts with myosin IIA and alters epithelial cell morphology
Source: Oxford University Press journal article supplement (doi:10.1242/jcs.057687), 2010-04-08
Supplement: jcs057687-sup-057687figs1.pdf [file jcs057687-sup-057687figs1.pdf]

**A**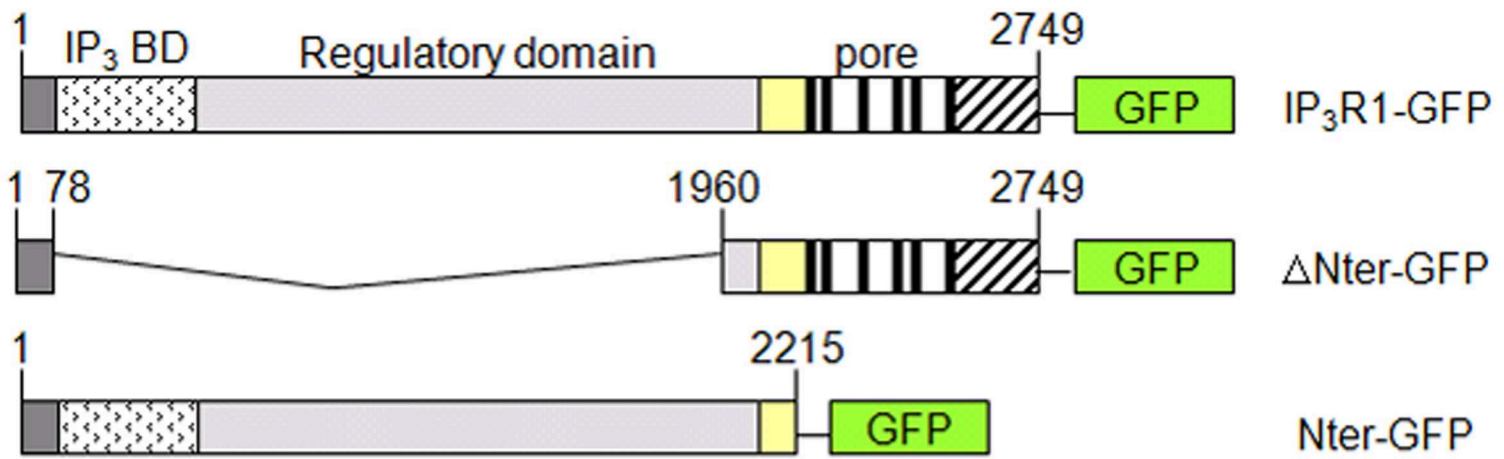**B**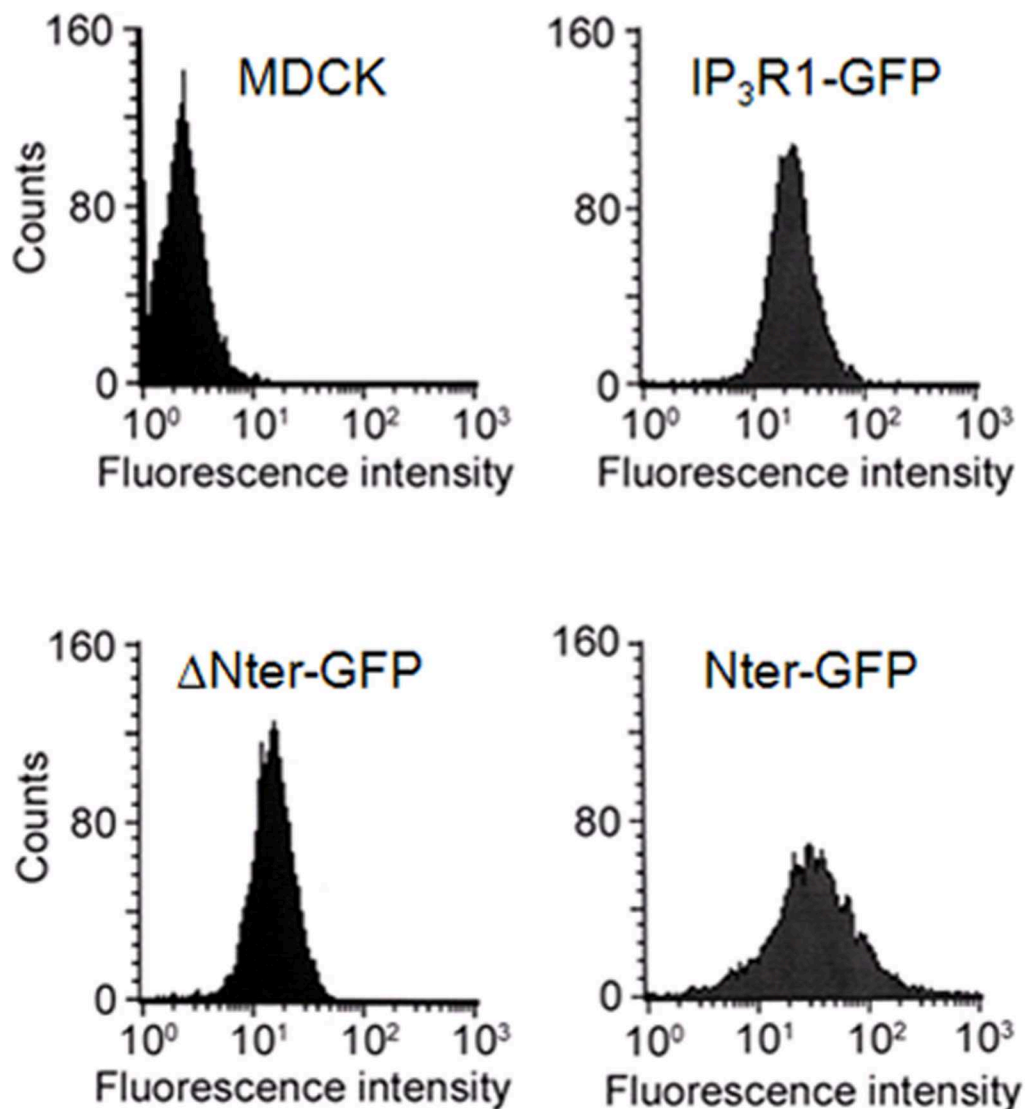

**FigureS1: A :** Schematic representation of the GFP-tagged constructs used in this study. Numbers indicate the amino acids that are still present in the deletion mutants. BD: binding domain **B :** Stable expression of IP<sub>3</sub>R-GFP, ΔNter-GFP and Nter-GFP in MDCK cells. Transfected cells exhibiting a bright fluorescence were sorted by FACS, expanded and analyzed again after 2 to 3 weeks of cell culture. Non transfected MDCK cells were used as negative controls. Data are presented as histograms of the intensity of fluorescence for each cell population.
