# Supplementary material for: The N-terminal domain of the type 1 Ins(1,4,5)P3 receptor stably expressed in MDCK cells interacts with myosin IIA and alters epithelial cell morphology
Source: Oxford University Press journal article supplement (doi:10.1242/jcs.057687), 2010-04-08
Supplement: jcs057687-sup-057687figs2.pdf [file jcs057687-sup-057687figs2.pdf]

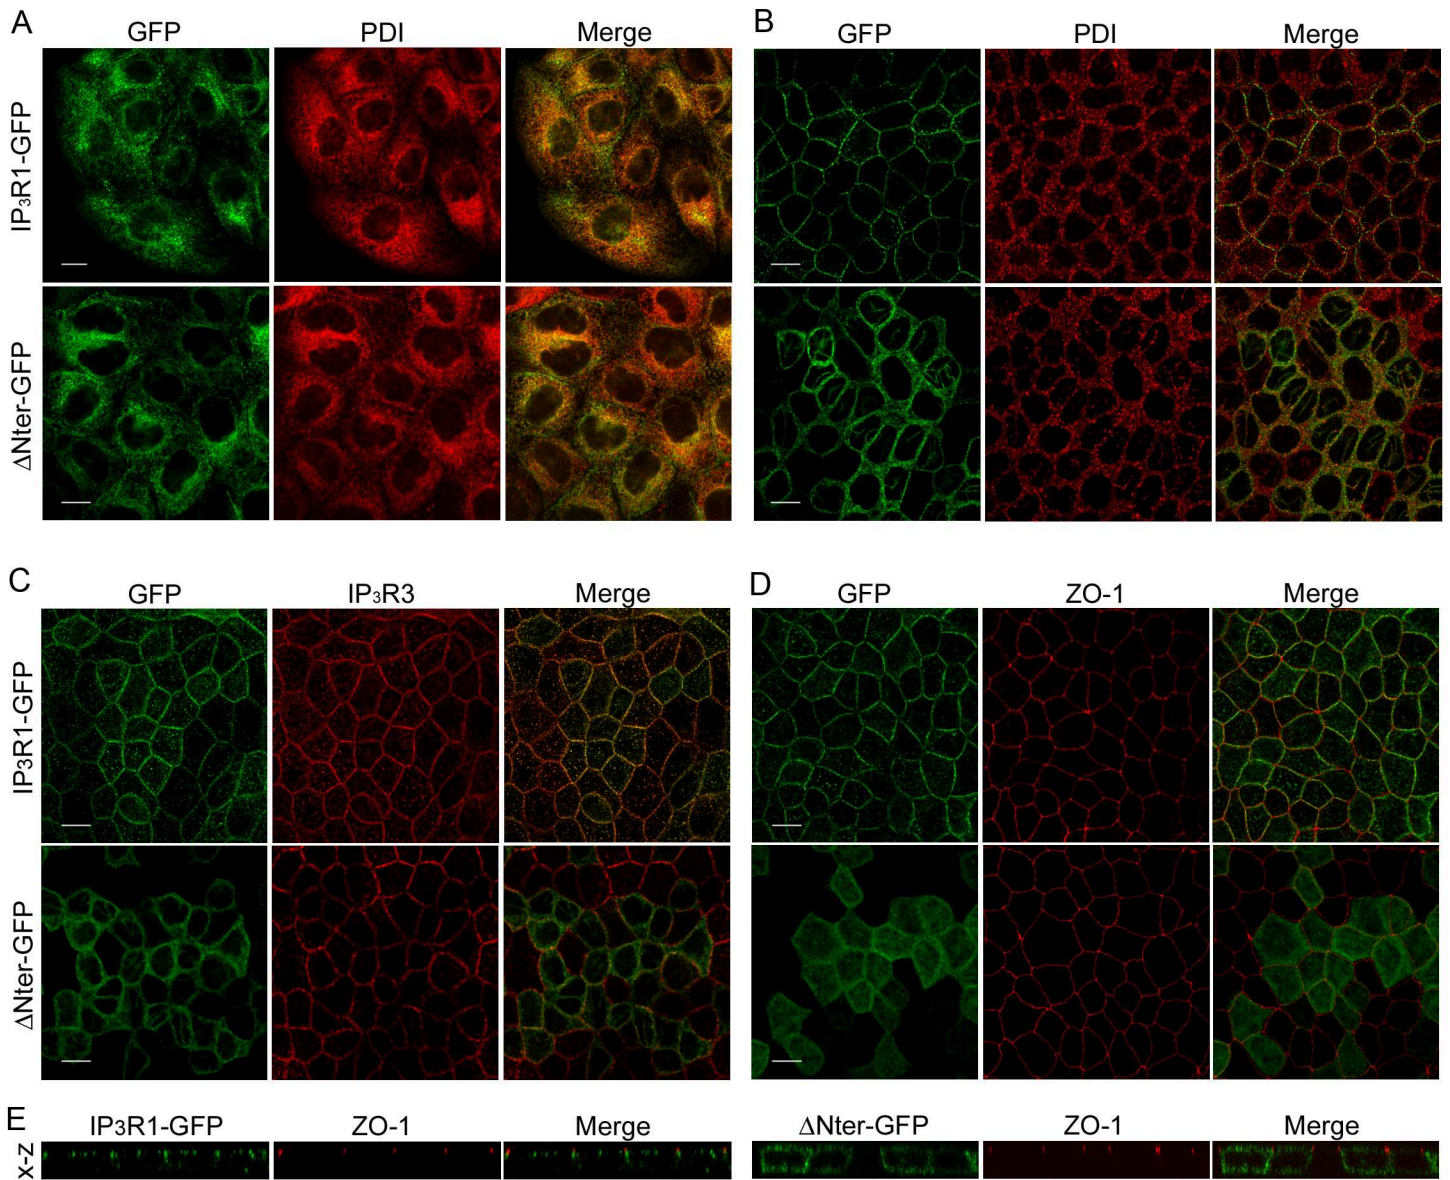

**Figure S2:  $\Delta$ Nter-GFP is still targeted to the ER membrane but does not translocate to the tight junctions as polarity develops.** **A:** representative x-y confocal sections showing overlapping distribution of IP<sub>3</sub>R1-GFP or  $\Delta$ Nter-GFP and the ER marker PDI in subconfluent MDCK cells. **B-D:** Representative x-y confocal sections of polarized MDCK cells expressing either IP<sub>3</sub>R1-GFP or  $\Delta$ Nter-GFP and stained for PDI (B), IP<sub>3</sub>R3 (C) or ZO-1 (D) demonstrating that, while IP<sub>3</sub>R1-GFP and endogenous IP<sub>3</sub>R3 translocate to the cell periphery upon MDCK epithelial cell differentiation,  $\Delta$ Nter-GFP remains evenly distributed in the ER and the nucleoplasmic reticulum. Scale bar, 10  $\mu$ m. **E:** x-z reconstructions showing that, in contrast to IP<sub>3</sub>R1-GFP,  $\Delta$ Nter-GFP does not accumulate at the tight junction level as defined by ZO-1 staining in polarized cells. This is likely not due to the saturation of the translocation mechanisms, as endogenous IP<sub>3</sub>Rs are normally recruited to the apex of the lateral membrane in  $\Delta$ Nter-GFP expressing cells. (x-z), 7,5  $\mu$ m.
