# Supplementary material for: The N-terminal domain of the type 1 Ins(1,4,5)P3 receptor stably expressed in MDCK cells interacts with myosin IIA and alters epithelial cell morphology
Source: Oxford University Press journal article supplement (doi:10.1242/jcs.057687), 2010-04-08
Supplement: jcs057687-sup-057687figs3.pdf [file jcs057687-sup-057687figs3.pdf]

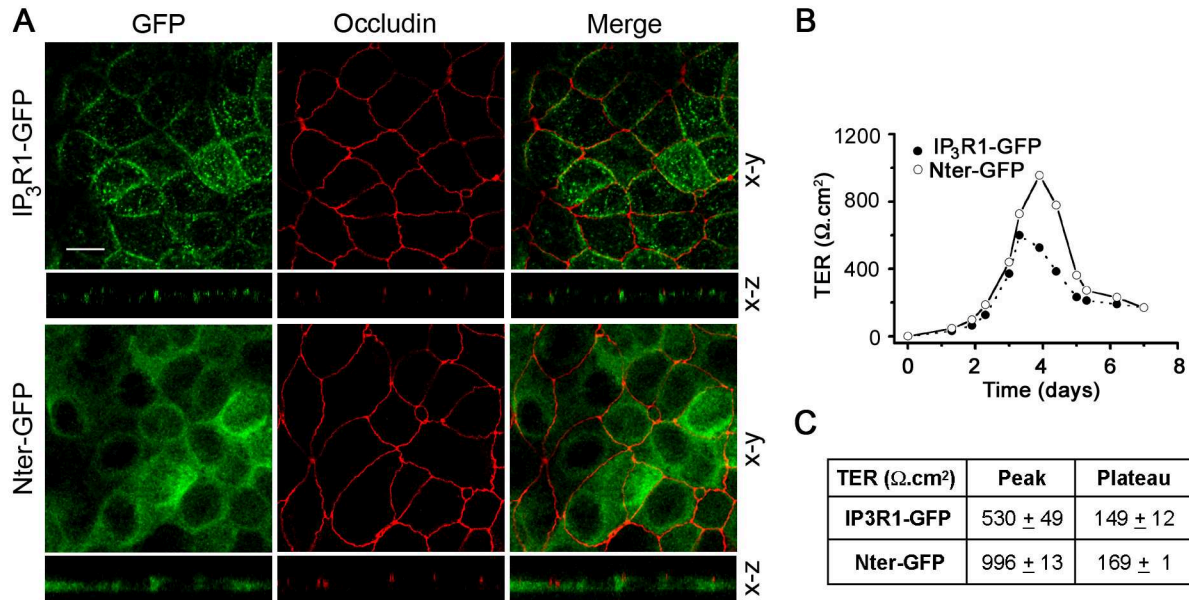

**Figure S3:** (A) Polarized MDCK cells expressing IP<sub>3</sub>R1-GFP or Nter-GFP were fixed, permeabilized, immunostained for occludin and imaged by confocal microscopy. Single confocal x-y sections captured at the TJ level and x-z projections are presented. Scale bar, 10  $\mu\text{m}$ . (x-z), 7.2  $\mu\text{m}$ . (B) Representative traces showing the TER development in MDCK cells expressing IP<sub>3</sub>R1-GFP (dotted line) or Nter-GFP (solid line) grown on filters (3413, Costar) over a week time period (Initial plating density:  $10^4$  cells/cm<sup>2</sup>) TER was measured at 37°C in culture medium at the indicated time points with a Millicel apparatus (Millipore), and background resistance of empty filters was subtracted. (C) Average peak and steady-state TER values derived from 3 independent experiments performed in duplicate are given  $\pm$  s.e.m.
