# Supplementary material for: The N-terminal domain of the type 1 Ins(1,4,5)P3 receptor stably expressed in MDCK cells interacts with myosin IIA and alters epithelial cell morphology
Source: Oxford University Press journal article supplement (doi:10.1242/jcs.057687), 2010-04-08
Supplement: jcs057687-sup-057687figs4.pdf [file jcs057687-sup-057687figs4.pdf]

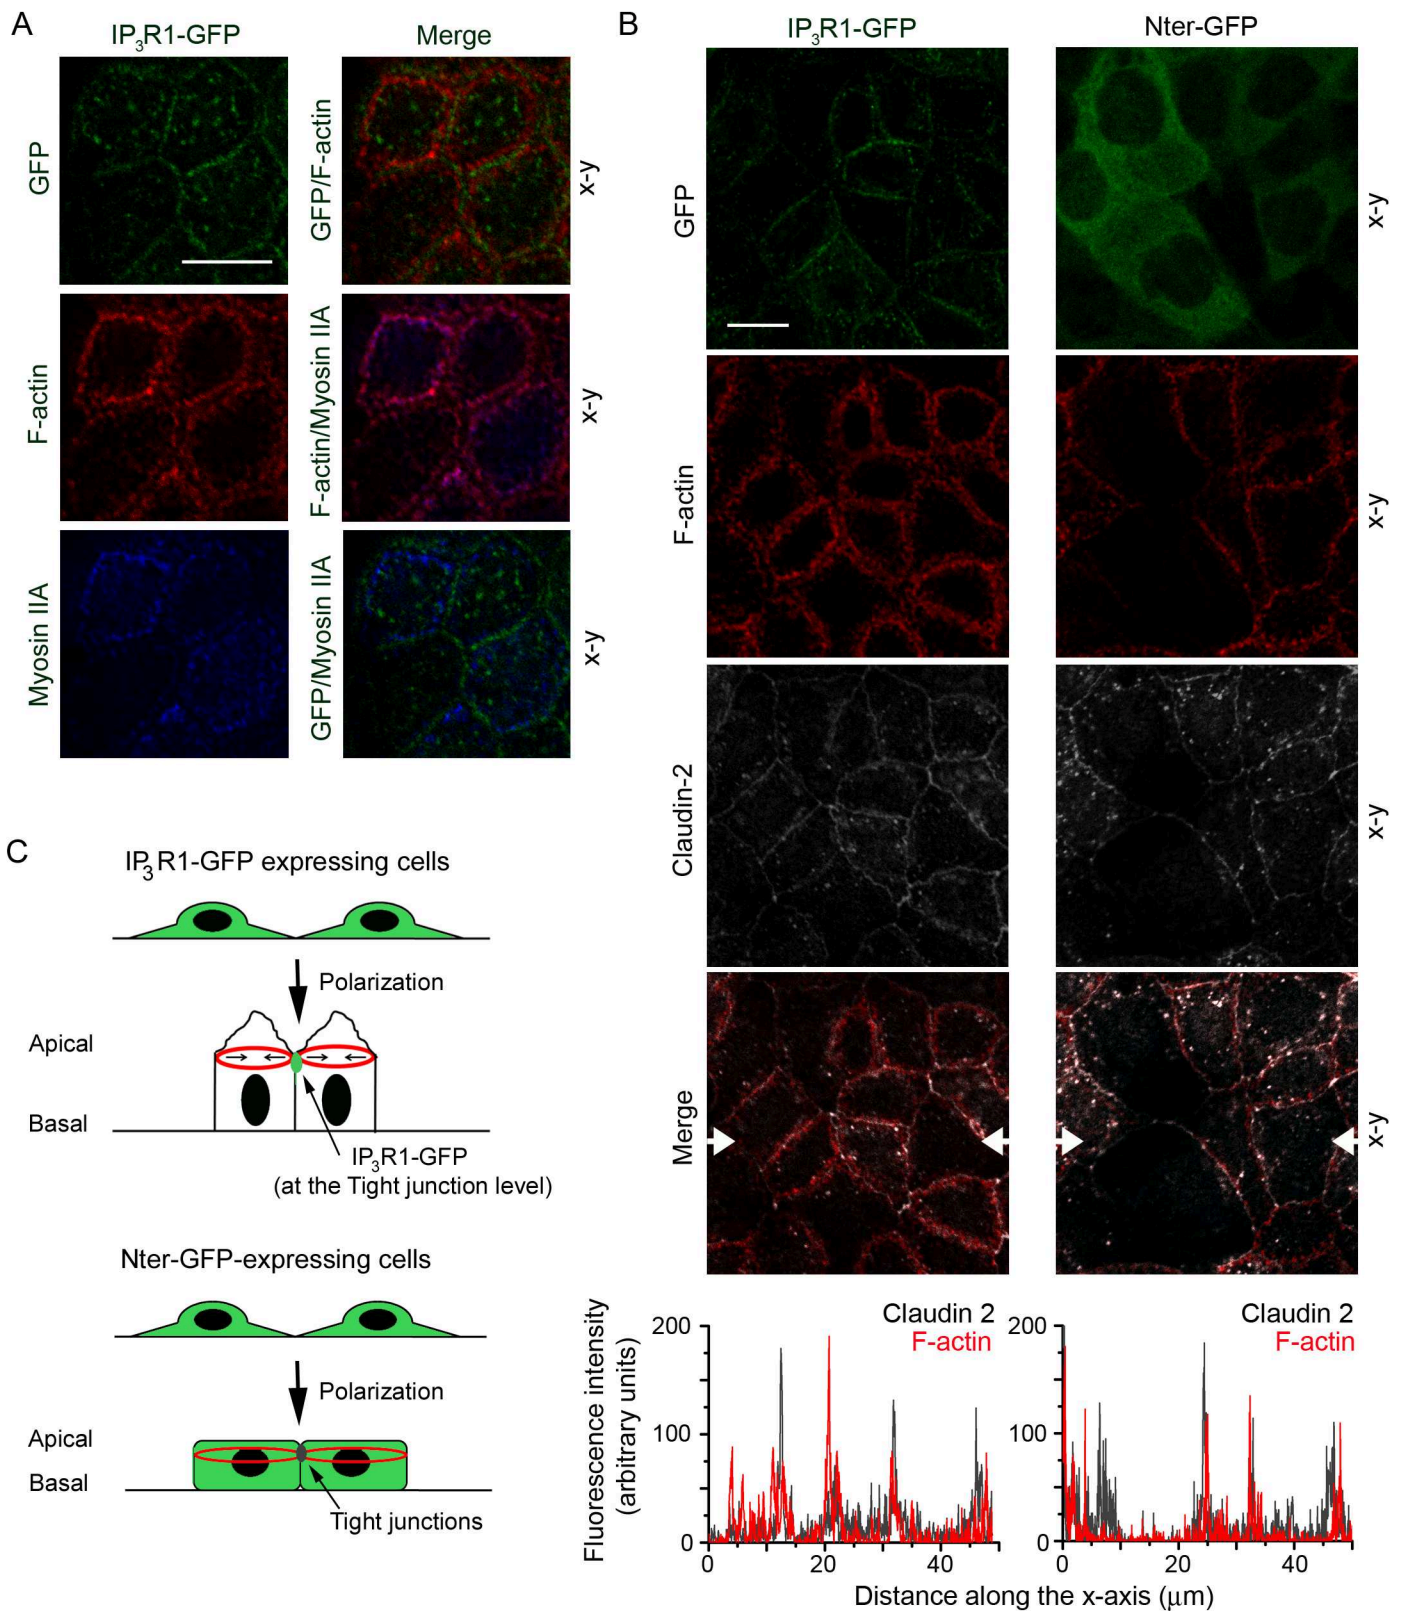

**Figure S4: Organization of the perijunctional F-actin belt in IP<sub>3</sub>R1-GFP and Nter-GFP cells.** (A) Polarized MDCK cells expressing IP<sub>3</sub>R1-GFP were fixed, permeabilized and double stained for myosin IIA and F-actin. Representative images of myosin IIA and F-actin distribution in individual confocal x-y sections captured at the cell apex are shown. (B) Polarized MDCK cells expressing IP<sub>3</sub>R1-GFP or Nter-GFP were fixed, permeabilized and double-stained for claudin-2 and F-actin. Single confocal x-y sections captured at the TJ level and intensity profiles of rhodamine-phalloidin and claudin-2 fluorescence obtained along the x axis at the TJ level are presented. Arrows denote positions of the x-z projections. Scale bar, 10 μm. (C) Schematic illustrating the differences between polarized Nter-GFP and IP<sub>3</sub>R1-GFP cells. Red lines illustrate F-actin organization. Arrows represent the centripetal force imposed by myosin IIA on the perijunctional actin belt which contributes to cell compaction.
