# Supplementary material for: The N-terminal domain of the type 1 Ins(1,4,5)P3 receptor stably expressed in MDCK cells interacts with myosin IIA and alters epithelial cell morphology
Source: Oxford University Press journal article supplement (doi:10.1242/jcs.057687), 2010-04-08
Supplement: jcs057687-sup-057687figs5.pdf [file jcs057687-sup-057687figs5.pdf]

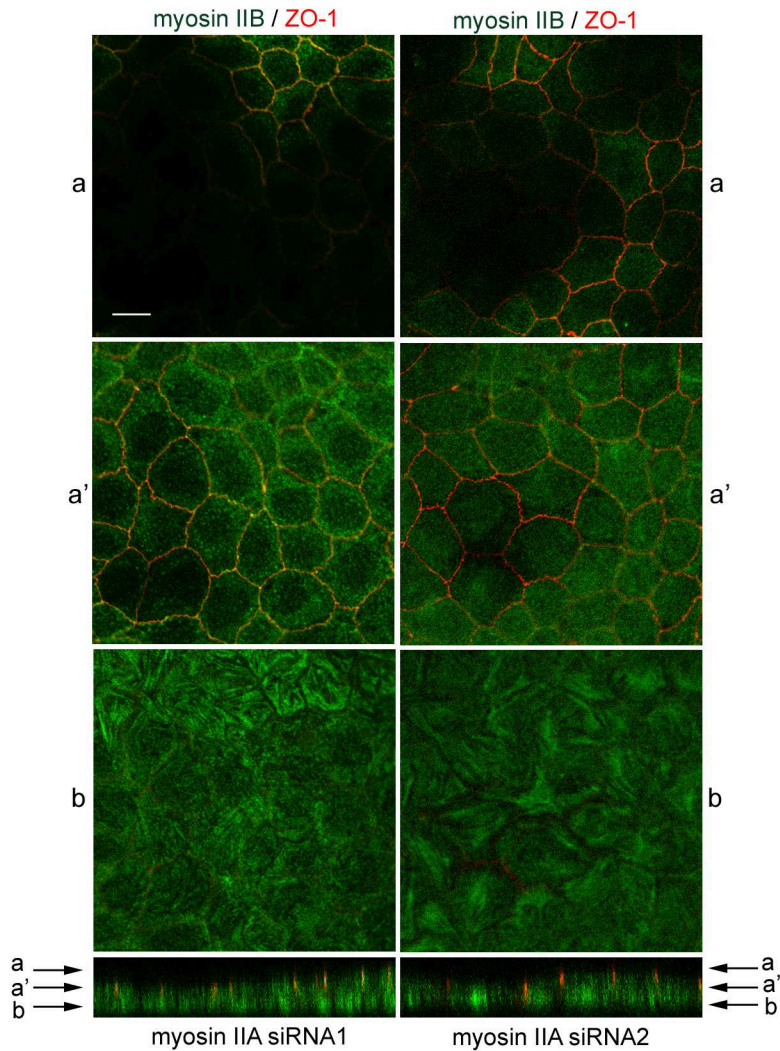

**Figure S5: Myosin IIA-targeted siRNAs do not significantly suppress myosin IIB expression.**

Confluent MDCK cells were transfected with myosin IIA-targeted siRNA1 and on day 3 post-transfection, were fixed and stained for myosin IIB and ZO-1. B: Representative confocal x-y and x-z sections showing that myosin IIB expression was not highly affected even in cells exhibiting the same morphological defects than myosin IIA-depleted cells. Scale bar, 10  $\mu\text{m}$ ; (x-z), 8.4  $\mu\text{m}$ .
